# Supplementary material for: HPV-Positive and -Negative Cervical Cancers Are Immunologically Distinct
Source: MDPI journal article supplement (doi:10.3390/jcm11164825), 2022-08-18
Supplement: s1 [file s1]

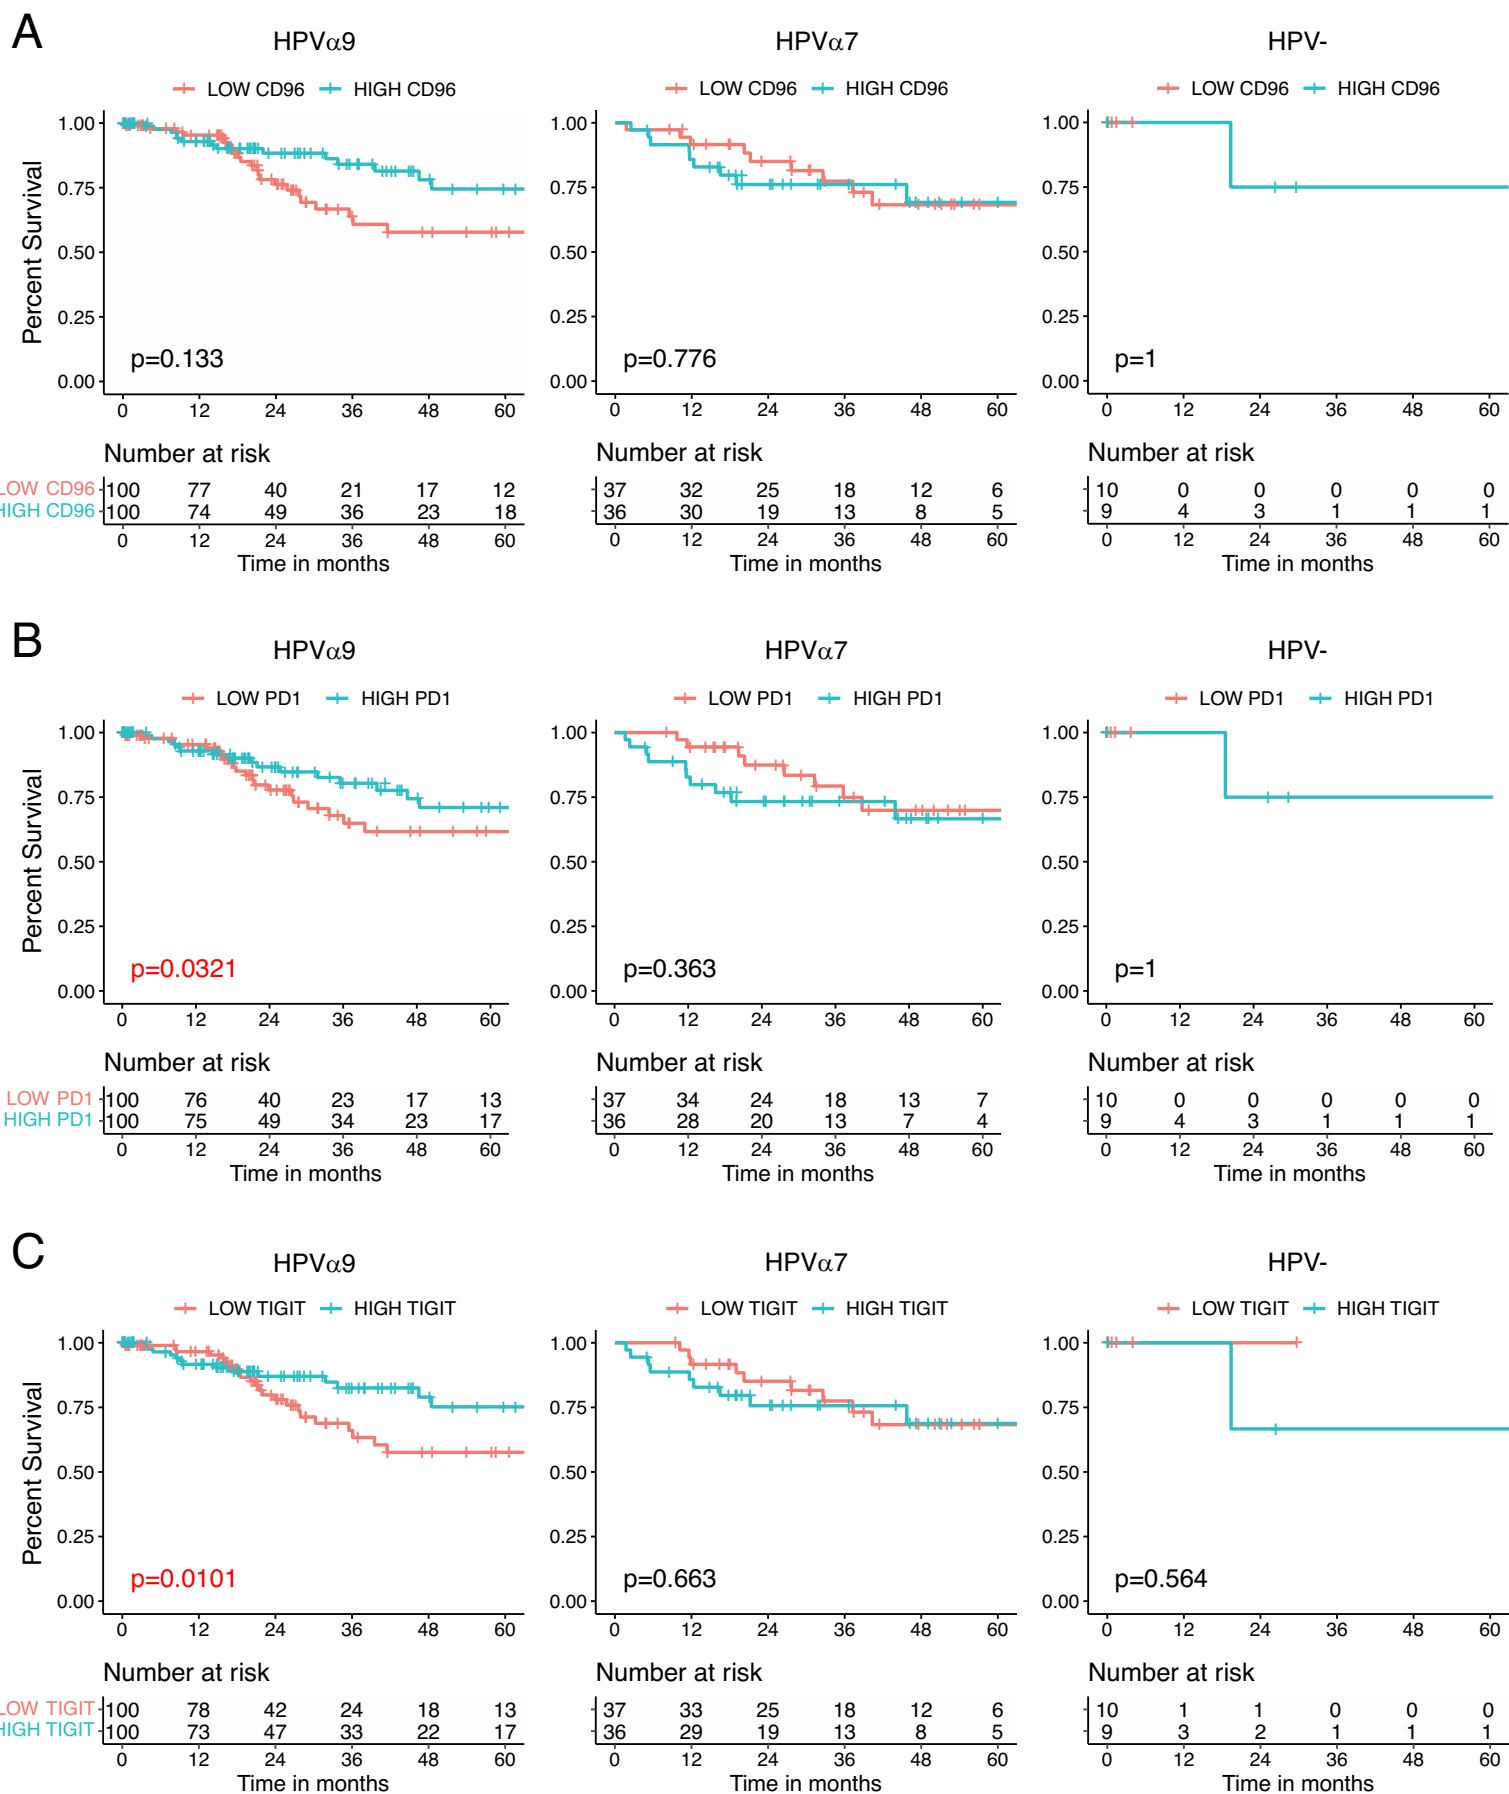

Figure S1: Impact of expression of selected immune checkpoint markers on patient overall survival. Kaplan-Meier analysis of patient survival for HPV $\alpha$ 9, HPV $\alpha$ 7 and HPV- patients dichotomized by median expression of CD96 (A), PD1 (B) or TIGIT (C). Statistically significant p values are indicated in red ( $p < 0.05$ ).
